# Supplementary material
Source: publisher site journal article supplement (https://www.dovepress.com/article/391867)
Supplement: Supplementary file 1 [file get_supplementary_file.php]

**Supplemental Material**

**Supplemental Material S1. Missing Data Analysis**

The results of the missing data analysis indicated that adolescents who remained in the study reported a higher level of demandingness than those who left the study. However, there were no significant difference between the longitudinally retained and missing individuals on any other studied variables at Time 1.

**Table S1** Missing Data Analysis

|  | Retained individuals | Missing individuals | *t* value | *p* value |
| --- | --- | --- | --- | --- |
| Responsiveness | 3.49 | 3.51 | -0.02 | .804 |
| Demandingness | 3.61 | 3.42 | 0.19 | .014 |
| Autonomy granting | 3.45 | 3.51 | -0.06 | .517 |
| Resilience | 3.62 | 3.60 | 0.02 | .765 |

**Supplemental Material S2. Mediation Analysis of the Alternative Model**

**Table S2** The Effects of Resilience on Life Satisfaction via Parenting Practices

| Path | Standardized Estimate | 95% CI |
| --- | --- | --- |
| Direct effect |  |  |
| Resilience → Life Satisfaction | .45 | [.31, .58] |
| Specific indirect effect |  |  |
| Resilience → Responsiveness → Life Satisfaction | .05 | [.01, .11] |
| Resilience → Demandingness → Life Satisfaction | .02 | [-.001, .06] |
| Resilience → Autonomy Granting → Life Satisfaction | .03 | [.001, .08] |
